# Supplementary material for: Separation of phenolic compounds by centrifugal partition chromatography
Source: Royal Society of Chemistry journal article supplement (doi:10.1039/c8gc00179k), 2018-01-01
Supplement: c8gc00179k1.pdf [file c8gc00179k1.pdf]

## Electronic Supporting Information (ESI†)

### Separation of phenolic compounds by centrifugal partition chromatography

João H. P. M. Santos<sup>1</sup>, Mafalda R. Almeida<sup>1</sup>, Cláudia I. R. Martins<sup>1</sup>, Ana C. R. V. Dias<sup>2</sup>

Mara G. Freire<sup>1</sup>, João A. P. Coutinho<sup>1</sup>, Sónia P.M. Ventura<sup>1\*</sup>

<sup>1</sup> CICECO - Aveiro Institute of Materials, Department of Chemistry, University of  
Aveiro, 3810-193 Aveiro, Portugal

<sup>2</sup> CESAM - Centre for Environmental and Marine Studies, Department of Environment  
and Planning, University of Aveiro, 3810-193 Aveiro, Portugal

**\*Corresponding author**

Campus Universitário de Santiago, University of Aveiro, Aveiro, Portugal

Tel: +351 234 401418; E-mail address: spventura@ua.pt

**Table S1:** Recovery of phenolic compounds towards the PEG-8000-rich phase (Rec<sub>Top</sub> %) by applying polymer-based ABS using inorganic salts or ionic liquids as electrolytes.

| Electrolyte                                            | Rec <sub>Top</sub> CA ± σ (%) | Rec <sub>Top</sub> PA ± σ (%) | Rec <sub>Top</sub> FA ± σ (%) | Rec <sub>Top</sub> SA ± σ (%) | Rec <sub>Top</sub> VN ± σ (%) |
|--------------------------------------------------------|-------------------------------|-------------------------------|-------------------------------|-------------------------------|-------------------------------|
| NaCl                                                   | 89.6 ± 1.8                    | 53.92 ± 0.35                  | 45.69 ± 0.27                  | 60.20 ± 3.01                  | 54.68 ± 2.73                  |
| Na <sub>2</sub> SO <sub>4</sub>                        | 62.0 ± 1.9                    | 64.31 ± 0.10                  | 51.8 ± 6.7                    | 59.52 ± 2.98                  | 58.52 ± 2.93                  |
| [C <sub>2</sub> mim]Cl                                 | 57.3 ± 3.2                    | 51.75 ± 0.22                  | 44.6 ± 1.1                    | 59.21 ± 2.96                  | 57.85 ± 2.89                  |
| [C <sub>2</sub> mim][CF <sub>3</sub> SO <sub>3</sub> ] | 57.8 ± 3.0                    | 85.5 ± 1.7                    | 46.8 ± 2.5                    | 58.20 ± 2.91                  | 56.25 ± 2.81                  |
| [C <sub>2</sub> mim][CH <sub>3</sub> SO <sub>3</sub> ] | 73.28 ± 0.48                  | 48.5 ± 1.6                    | 39.40 ± 0.13                  | 59.25 ± 2.95                  | 58.98 ± 2.95                  |
| [C <sub>2</sub> mim][TOS]                              | 56.3 ± 2.1                    | 61.2 ± 2.1                    | 25.4 ± 5.8                    | 59.75 ± 2.99                  | 58.87 ± 2.94                  |
| [C <sub>2</sub> mim][N(CN) <sub>2</sub> ]              | 56.65 ± 0.32                  | 7.44 ± 0.60                   | 21.62 ± 0.95                  | 59.95 ± 3.00                  | 56.25 ± 2.81                  |

**Table S2:** GHG emission factors used in the calculation of the carbon footprint and name

| Input       | Reference unit | GHG emissions (kg CO <sub>2eq</sub> /reference unit) <sup>a</sup> | Name of the process in Ecoinvent                |
|-------------|----------------|-------------------------------------------------------------------|-------------------------------------------------|
| PEG 8000    | kg             | 1.841                                                             | Ethylene glycol production, Europe <sup>b</sup> |
| NaPA 8000   | kg             | 1.988                                                             | Acrylic acid production, Europe <sup>c</sup>    |
| NaCl        | kg             | 0.184                                                             | Sodium chloride production, powder, Europe      |
| Water       | kg             | 8.1E-04                                                           | -                                               |
| Electricity | kWh            | 0.413                                                             | Market for electricity, low voltage, Portugal   |

of the processes taken from Ecoinvent version 3.4.

<sup>a</sup> Global warming potentials for converting the mass of each GHG into mass of CO<sub>2eq</sub> are those recommended by the Intergovernmental Panel on Climate Change (IPCC)<sup>1</sup> for a time horizon of 100 years.

<sup>b</sup> In the absence of data for the production of polyethylene glycol, this process was selected as the most similar. <sup>c</sup> In the absence of data for the production of sodium polyacrylate, this process was selected as the most similar.

**Table S3:** Partition coefficient of the ionic liquids as electrolytes in PEG/NaPA 8000 ABS.<sup>2</sup>

| <b>Electrolyte</b>                                     | <b><math>K_{IL} \pm \sigma</math> (%)</b> |
|--------------------------------------------------------|-------------------------------------------|
| [C <sub>2</sub> mim]Cl                                 | 0.77 ± 0.01                               |
| [C <sub>2</sub> mim][CF <sub>3</sub> SO <sub>3</sub> ] | 0.44 ± 0.01                               |
| [C <sub>2</sub> mim][CH <sub>3</sub> SO <sub>3</sub> ] | 0.34 ± 0.02                               |
| [C <sub>2</sub> mim][TOS]                              | 0.69 ± 0.04                               |
| [C <sub>2</sub> mim][N(CN) <sub>2</sub> ]              | 0.98 ± 0.03                               |

**Table S4:** Partition coefficient (K) of phenolic compounds, namely ferulic (FA), protocatechuic (PA), caffeic (CA) acids, vanillin (VN) and syringaldehyde (SA), using inorganic salts or ionic liquids as electrolytes in polymer-based ABS. The pH values and volume ratio ( $V_R$ ) of each ABS are also given.

| Electrolyte                                            | $K_{CA} \pm \sigma$ | $K_{PA} \pm \sigma$ | $K_{FA} \pm \sigma$ | $K_{SA} \pm \sigma$ | $K_{VN} \pm \sigma$ | pH ( $\pm 0.1$ ) |        | $V_R \pm \sigma$ |
|--------------------------------------------------------|---------------------|---------------------|---------------------|---------------------|---------------------|------------------|--------|------------------|
|                                                        |                     |                     |                     |                     |                     | Top              | Bottom |                  |
| NaCl                                                   | $2.78 \pm 0.2$      | $0.44 \pm 0.04$     | $0.23 \pm 0.01$     | $1.23 \pm 0.02$     | $1.12 \pm 0.05$     | 6.7              | 6.6    | $3.0 \pm 0.1$    |
| Na <sub>2</sub> SO <sub>4</sub>                        | $1.8 \pm 0.3$       | $1.69 \pm 0.02$     | $0.9 \pm 0.3$       | $1.18 \pm 0.02$     | $1.17 \pm 0.04$     | 6.9              | 6.8    | $1.00 \pm 0.06$  |
| [C <sub>2</sub> mim]Cl                                 | $0.48 \pm 0.04$     | $0.41 \pm 0.04$     | $0.39 \pm 0.01$     | $1.21 \pm 0.10$     | $1.21 \pm 0.04$     | 7.4              | 7.4    | $2.7 \pm 0.2$    |
| [C <sub>2</sub> mim][CF <sub>3</sub> SO <sub>3</sub> ] | $0.63 \pm 0.01$     | $1.9 \pm 0.23$      | $0.40 \pm 0.08$     | $1.20 \pm 0.04$     | $1.25 \pm 0.08$     | 7.3              | 7.2    | $2.9 \pm 0.2$    |
| [C <sub>2</sub> mim][CH <sub>3</sub> SO <sub>3</sub> ] | $0.92 \pm 0.08$     | $0.337 \pm 0.003$   | $0.239 \pm 0.002$   | $1.24 \pm 0.09$     | $1.24 \pm 0.05$     | 6.9              | 6.7    | $2.7 \pm 0.2$    |
| [C <sub>2</sub> mim][TOS]                              | $0.6 \pm 0.1$       | $0.57 \pm 0.02$     | $0.57 \pm 0.04$     | $1.24 \pm 0.07$     | $1.23 \pm 0.07$     | 7.4              | 7.2    | $2.5 \pm 0.1$    |
| [C <sub>2</sub> mim][N(CN) <sub>2</sub> ]              | $0.57 \pm 0.02$     | $0.0339 \pm 0.0001$ | $0.120 \pm 0.003$   | $1.23 \pm 0.02$     | $1.19 \pm 0.05$     | 7.6              | 7.4    | $2.3 \pm 0.1$    |

**Table S5:** Recovery experimental data obtained for each phenolic compound after the dialysis process and identification of the techniques used to analyse the isolation of the phenolic compounds from the polymeric-rich phases.

| <b>Phenolic compound extract</b> | <b>Rec <math>\pm</math> <math>\sigma</math> (%)</b> | <b>Isolation analysis</b> |
|----------------------------------|-----------------------------------------------------|---------------------------|
| FA                               | 84 $\pm$ 2                                          | <sup>1</sup> H NMR*       |
| CA                               | 87 $\pm$ 3                                          | UV-Vis*                   |
| PA                               | 65 $\pm$ 4                                          | <sup>1</sup> H NMR*       |
| VN and SA                        | 82 $\pm$ 3                                          | UV-Vis*                   |

Note: \* in all cases, ATR-FTIR was used to analyse the polymeric fractions obtained after the dialysis step, proving the absence of phenolic compounds in the PEG 8000 and NaPA 8000-rich phases, thus attesting the high purity of the polymeric phases after dialysis.

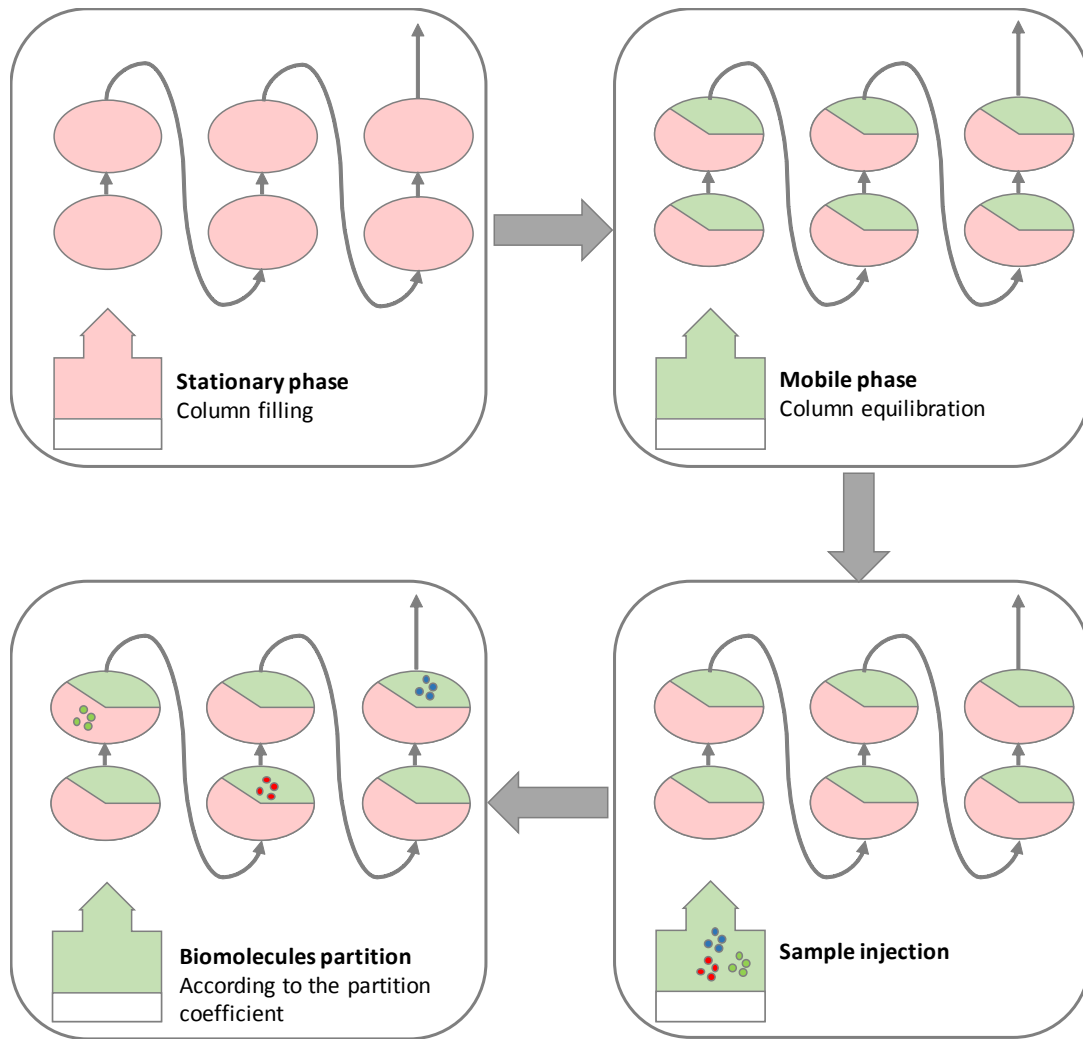

**Fig. S1:** Schematic representation of the CPC operation.

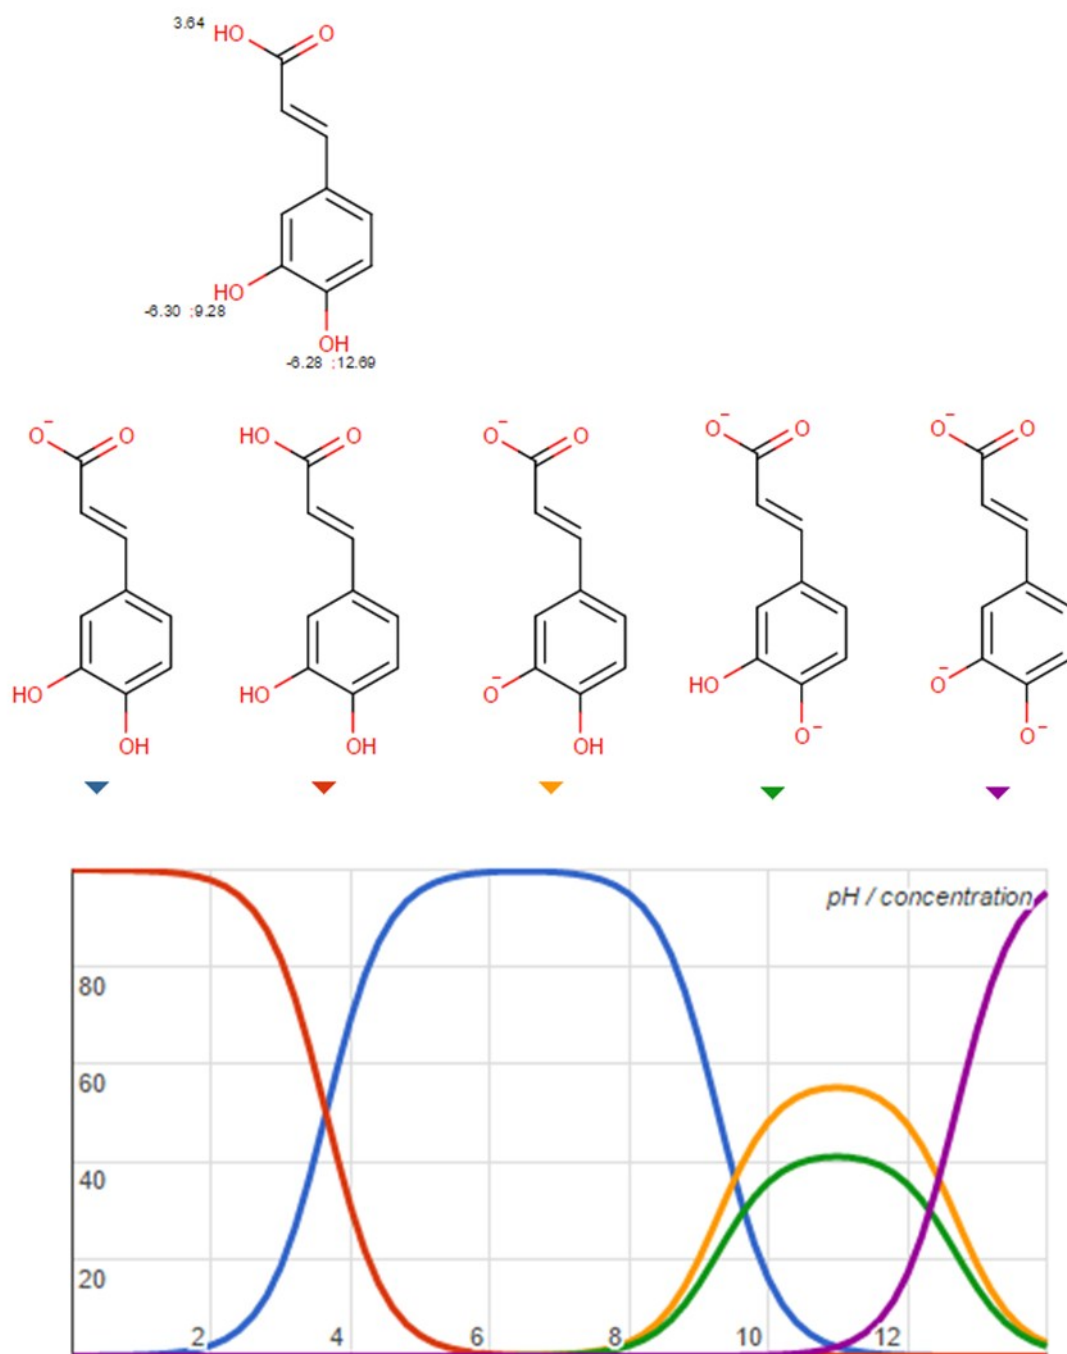

**Fig. S2:** Speciation of caffeic acid as a function of pH (ChemSpider database, accessed at August 24<sup>th</sup> 2017).

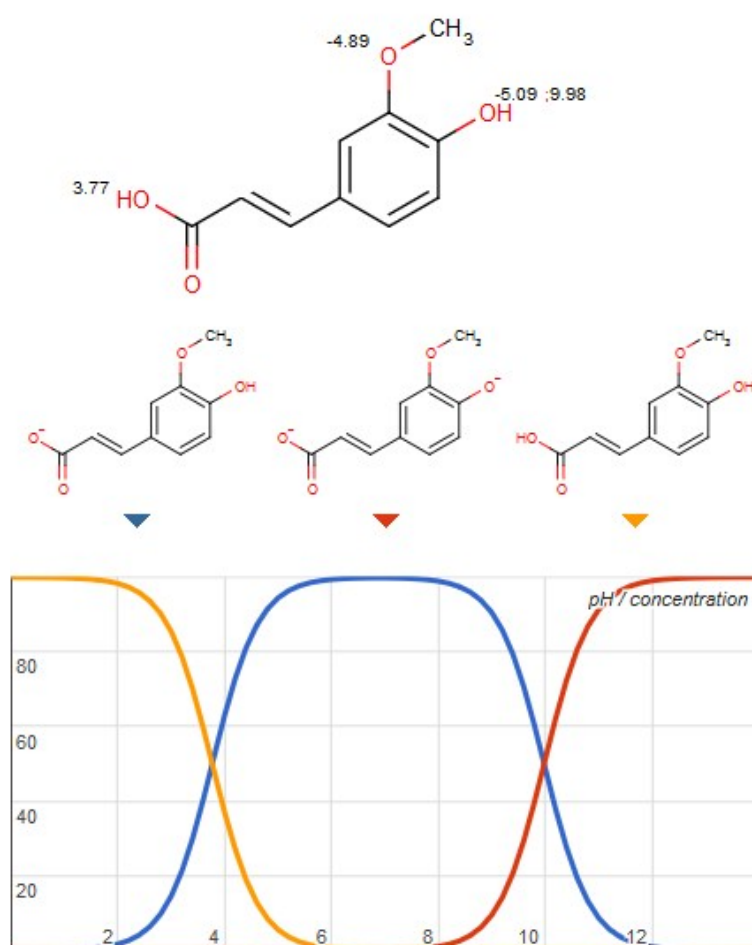

**Fig. S3:** Speciation of ferulic acid as a function of pH (ChemSpider database, accessed at August 24<sup>th</sup> 2017).



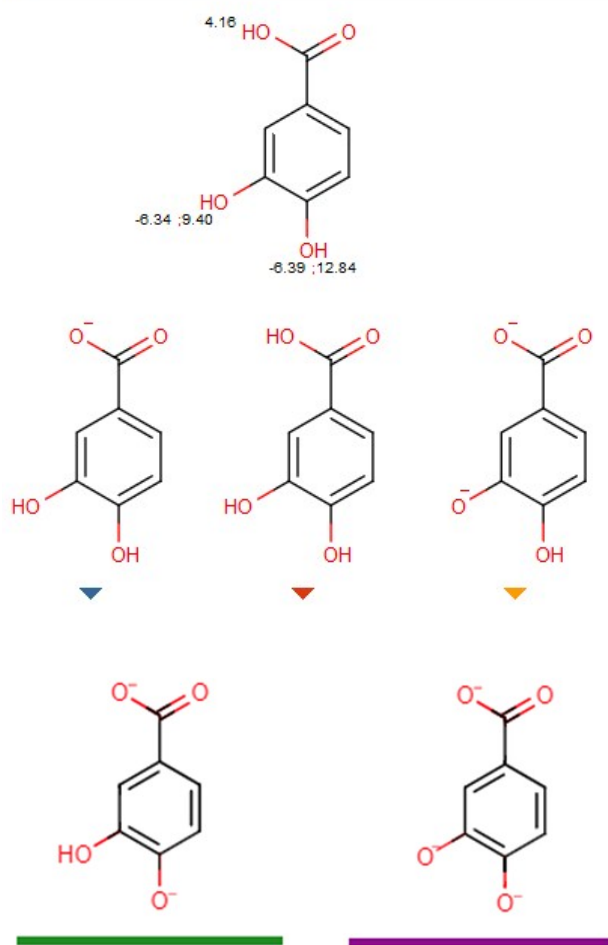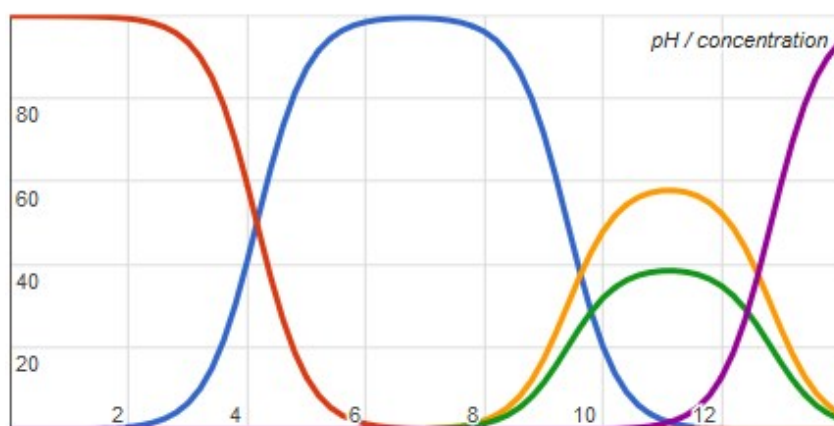

**Fig. S4:** Speciation of protocatechuic acid as a function of pH (ChemSpider database, accessed at August 24<sup>th</sup> 2017).

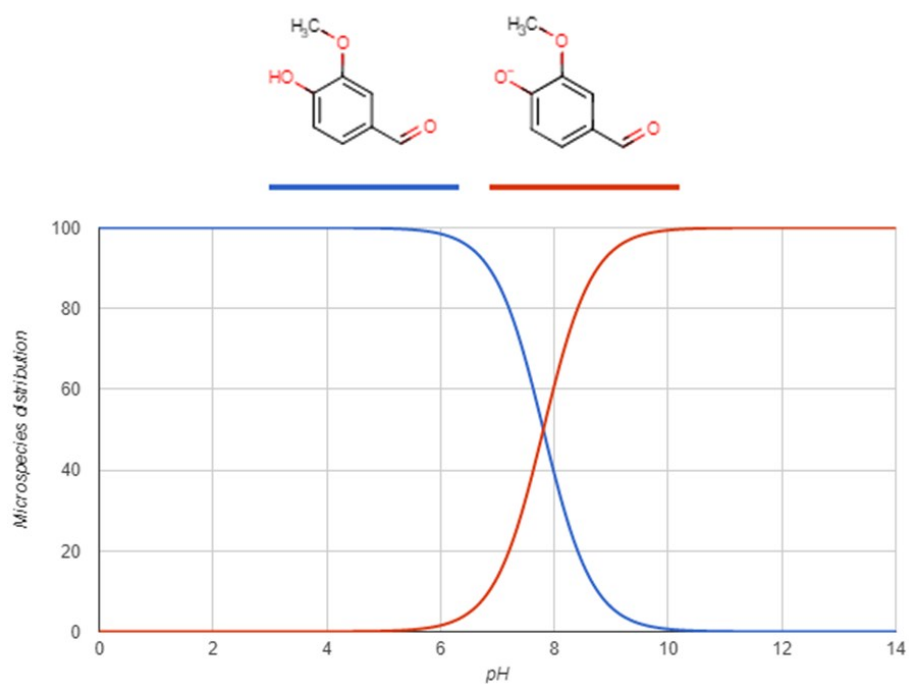

**Fig. S5:** Speciation of vanillin as a function of pH (ChemSpider database, accessed at January 9<sup>th</sup> 2018).

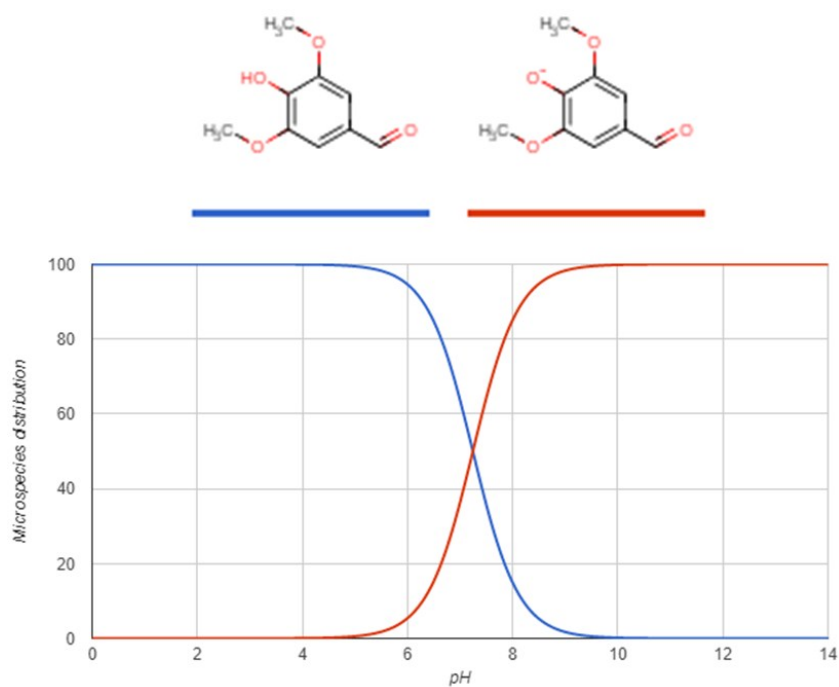

**Fig. S6:** Speciation of syringaldehyde as a function of pH (ChemSpider database, accessed at January 9<sup>th</sup> 2018).

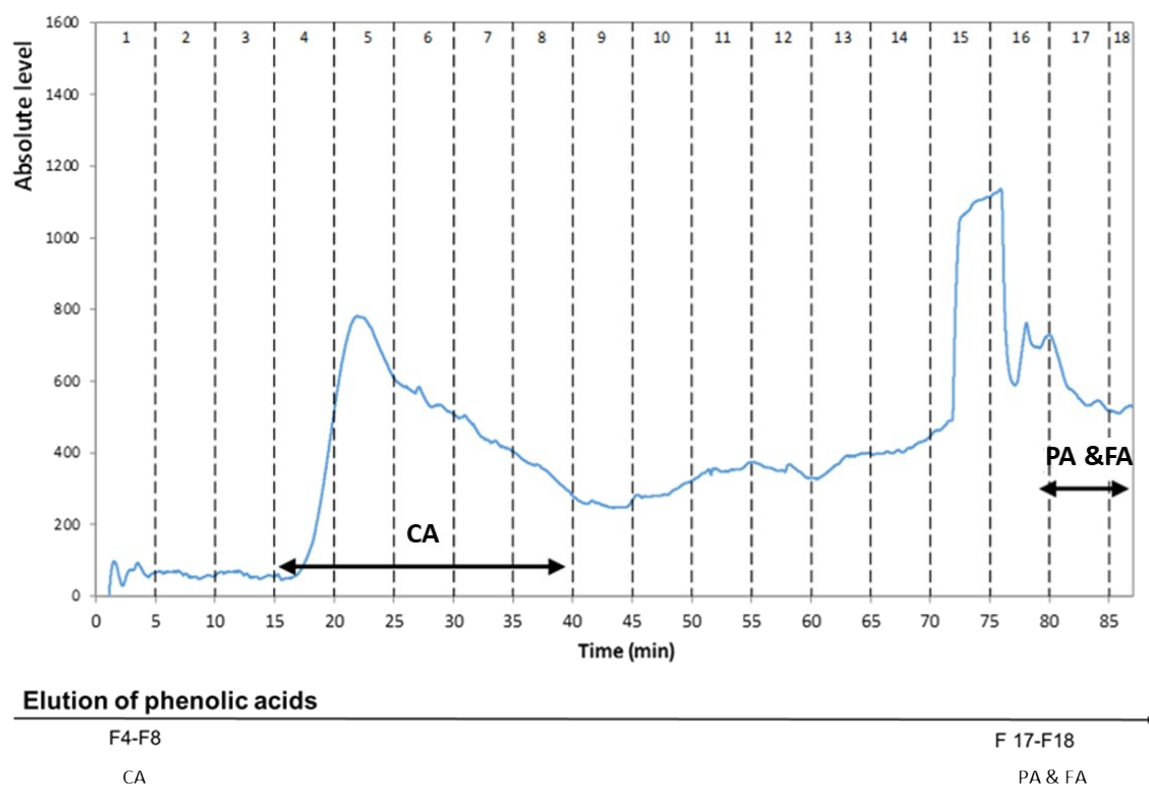

**Figure S7:** Separation of phenolic acids by CPC using the ABS composed of 15 wt% of PEG 8000 + 4.5 wt% of NaPA 8000 + 75.5 wt% of water + 5 wt% of NaCl. Experimental conditions: rotation speed of  $2000 \text{ rpm}\cdot\text{min}^{-1}$ ; flow-rate of  $1.0 \text{ mL}\cdot\text{min}^{-1}$ ;  $S_f = 20 \%$ ;  $P \approx 24 \text{ bar}$ ; detection wavelength of 280 nm.

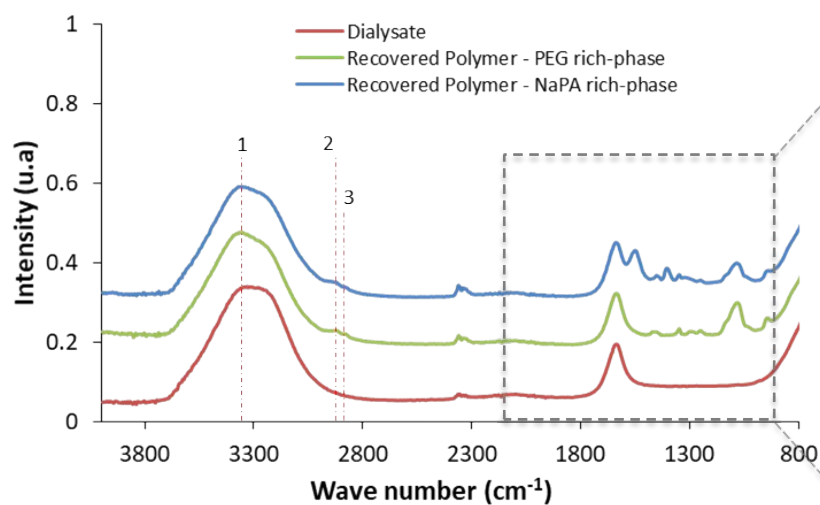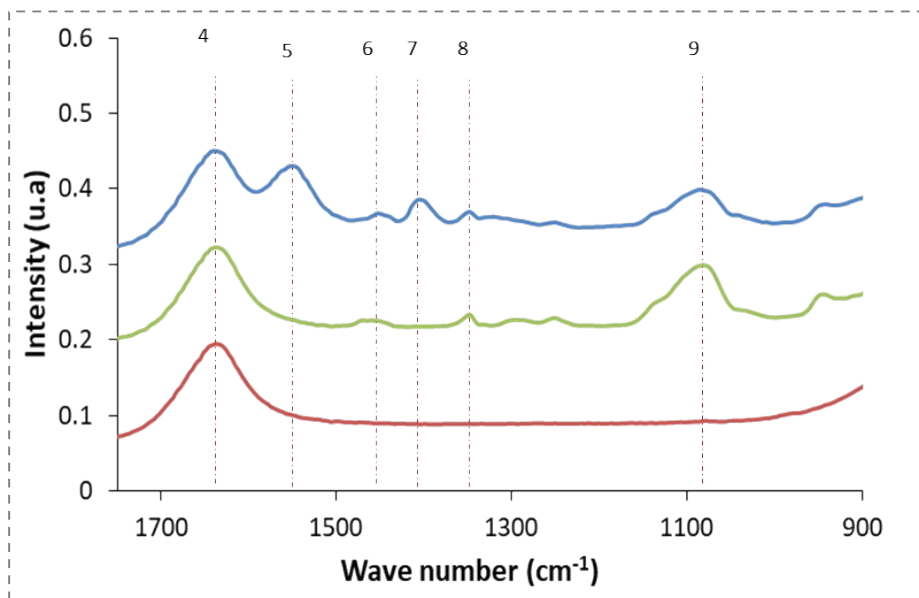

|   | Wave number (cm <sup>-1</sup> ) | Assignments                                    |
|---|---------------------------------|------------------------------------------------|
| 1 | 3400-3200                       | <b>Water:</b> O-H stretch                      |
| 2 | 2890                            | <b>Polymers:</b> CH <sub>2</sub> asym. stretch |
| 3 | 2860                            | <b>Polymers:</b> CH <sub>2</sub> sym. stretch  |
| 4 | 1625                            | <b>Water:</b> H-O-H bend                       |
| 5 | 1539                            | <b>NaPA:</b> -COO <sup>-</sup> sym. stretch    |
| 6 | 1445                            | <b>Polymers:</b> C-H bend                      |
| 7 | 1400                            | <b>NaPA:</b> -COO <sup>-</sup> sym. stretch    |
| 8 | 1342                            | <b>PEG:</b> O-H bend                           |
| 9 | 1070                            | <b>PEG:</b> C-O-C                              |

**Fig. S8:** ATR-FTIR spectra and respective assignment table of the dialysate and both polymeric fractions obtained after the isolation steps experimentally carried to both polymeric fractions.

(i)

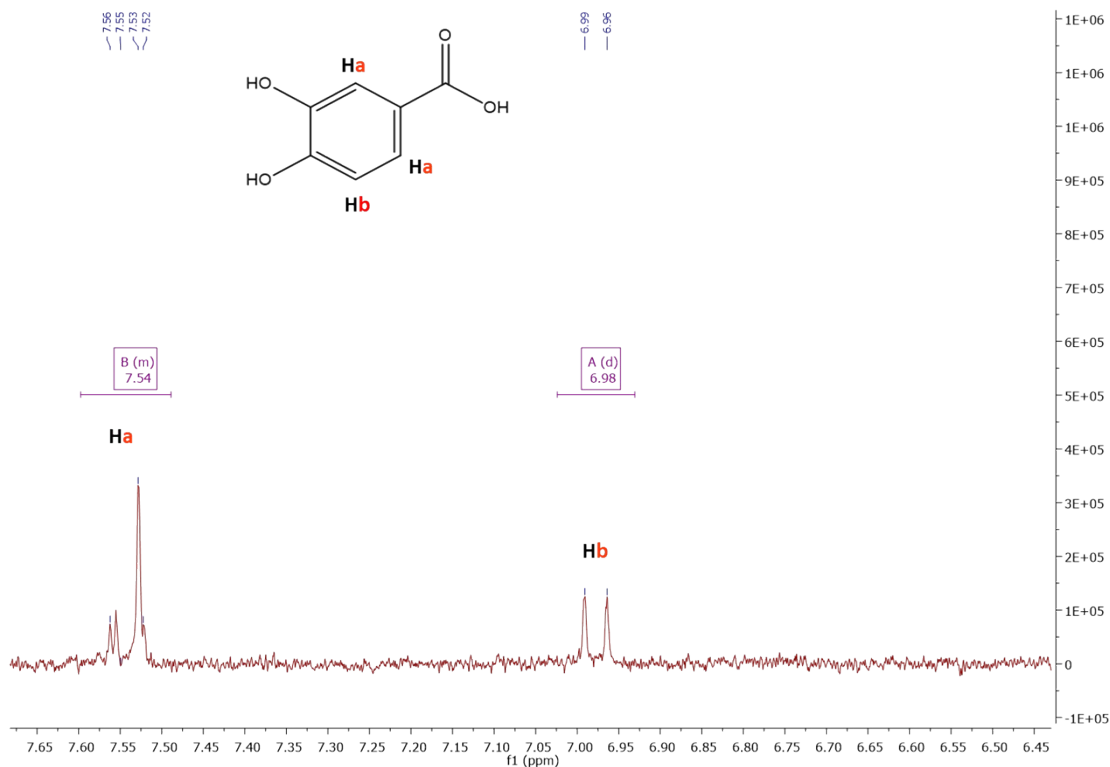

(ii)

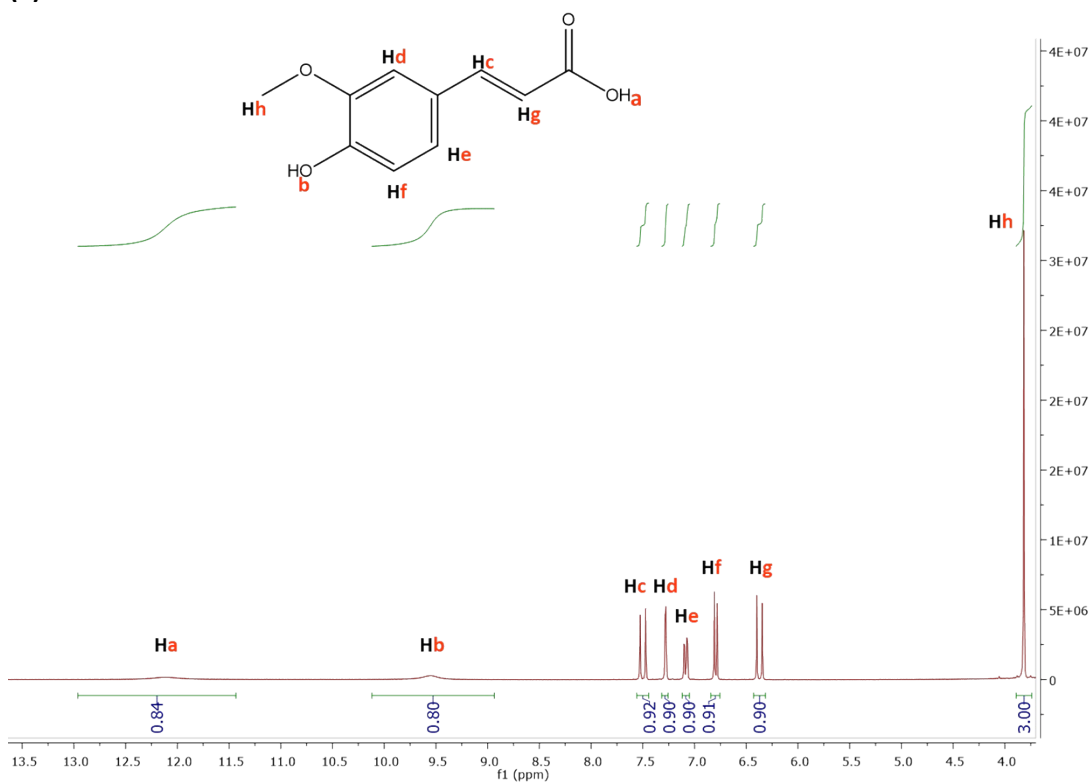

**Fig. S9:** <sup>1</sup>H NMR spectrum of (i) protocatechuic acid and (ii) ferulic acid in DMSO-d<sub>6</sub>, after its purification by CPC.

### Before the dialysis process

(i)

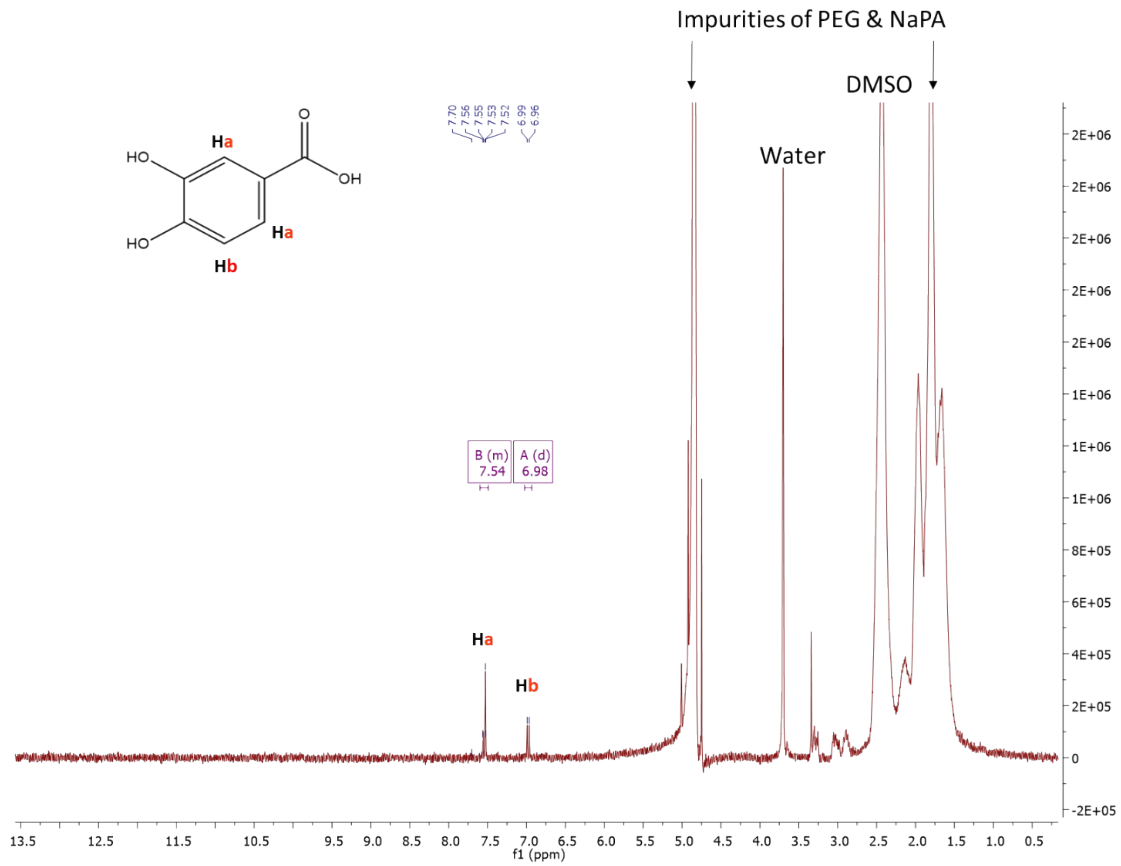

(ii)

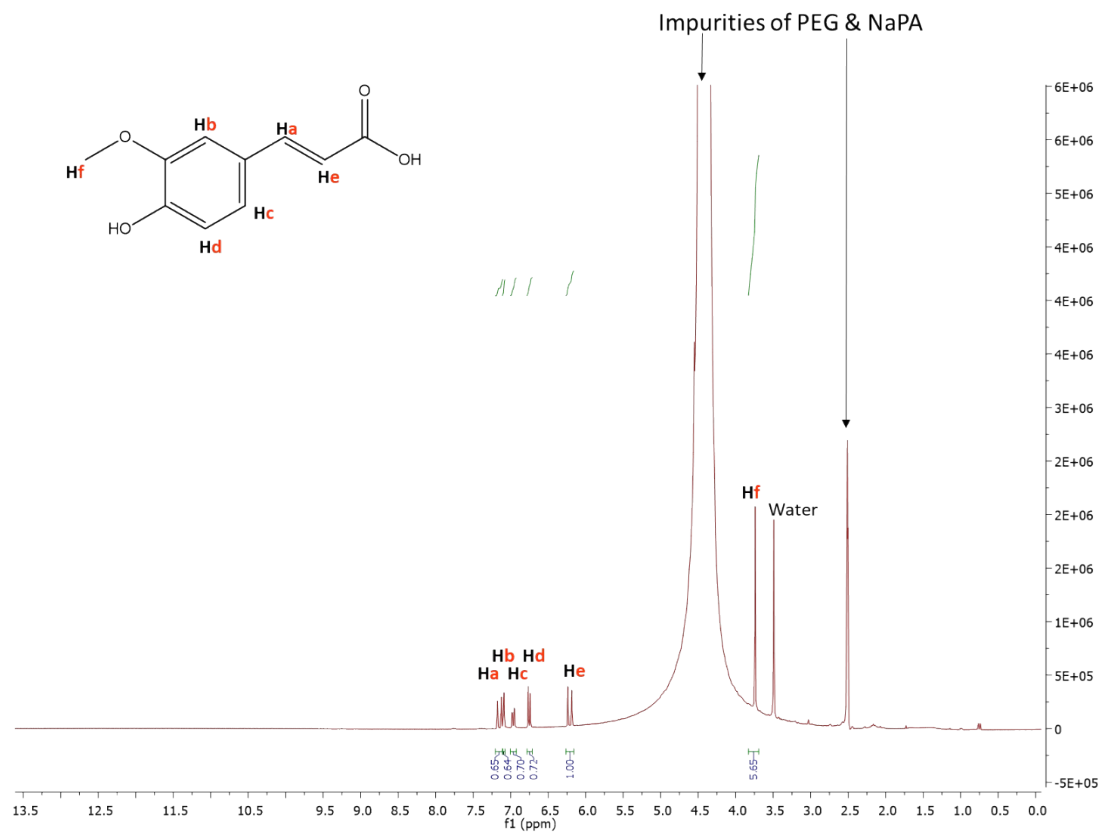

After the dialysis process  
(iii)

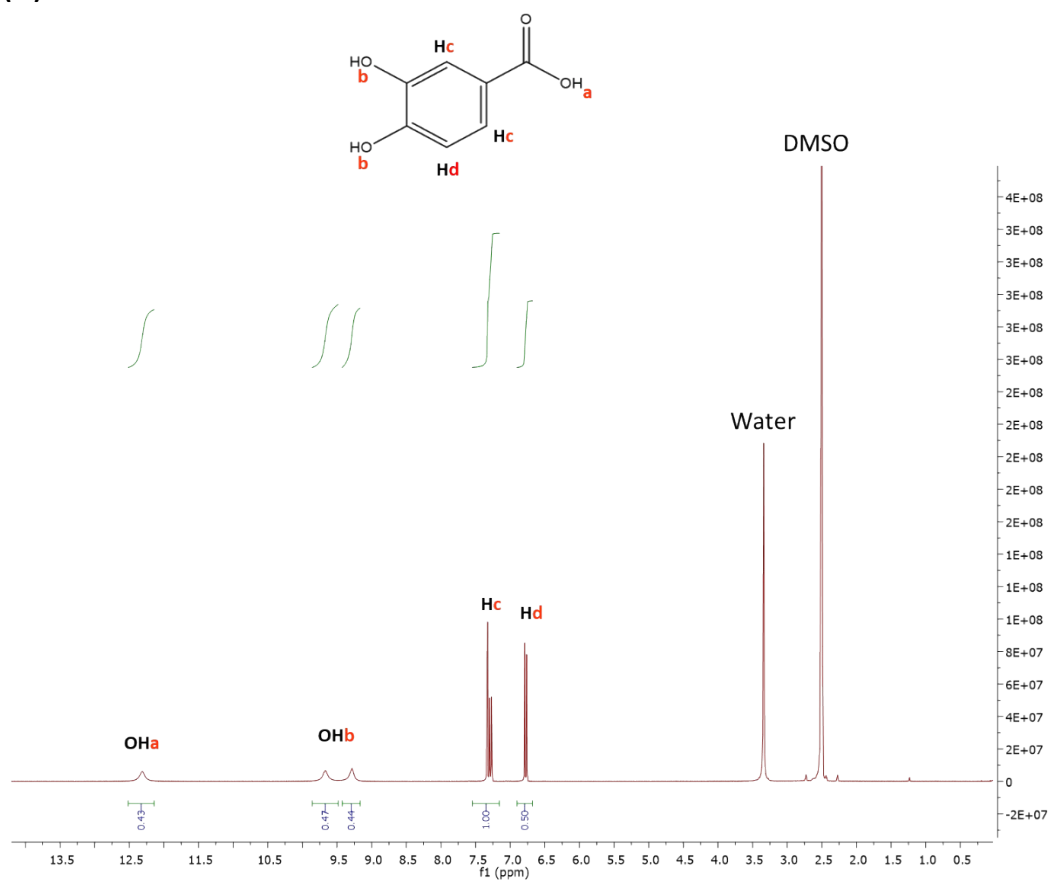

(iv)

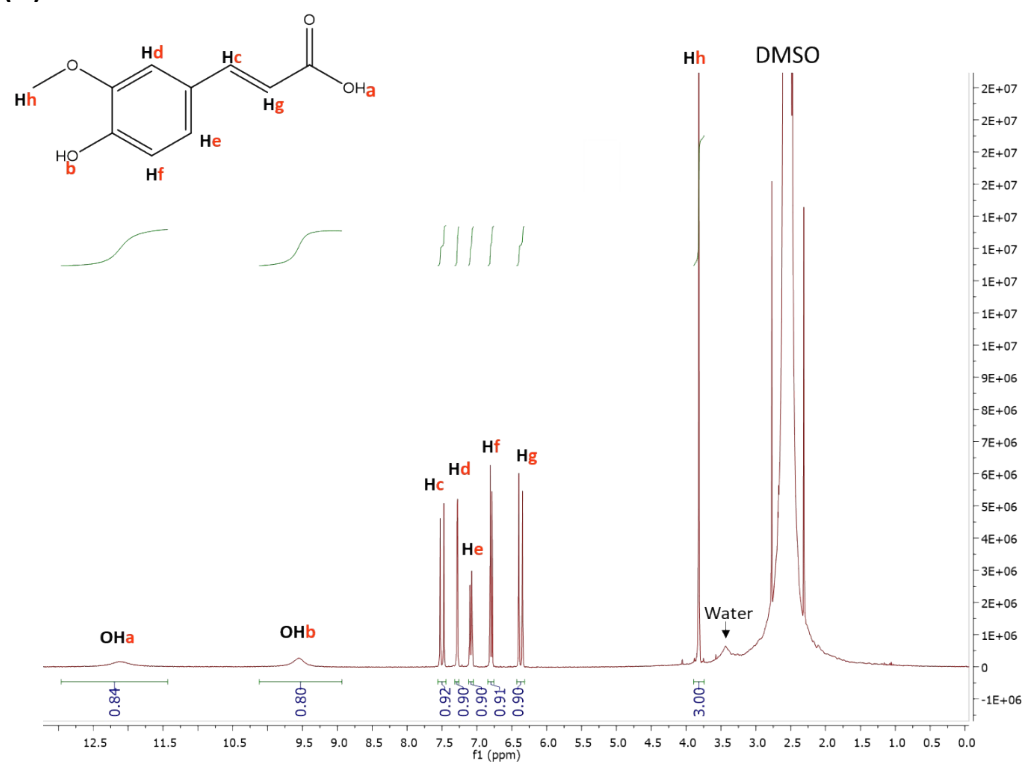

**Fig. S10:**  $^1\text{H}$  NMR spectrum in whole  $^1\text{H}$  region (0-13 ppm) of protocatechuic (i, iii) and ferulic acid (ii, iv) in DMSO- $d_6$ , before and after dialysis, respectively.

**References:**

(1) G. Myhre, D. Shindell, F.-M. Bréon, W. Collins, J. Fuglestedt, J. Huang, D. Koch, J.-F. Lamarque, D. Lee, B. Mendoza, T. Nakajima, A. Robock, G. Stephens, T. Takemura and H. Zhang, in *Climate Change 2013: The Physical Science Basis. Contribution of Working Group I to the Fifth Assessment Report of the Intergovernmental Panel on Climate Change*, 2013, pp. 659-740.

(2) J. H. P. M. Santos, F. A. e Silva, J. A. P. Coutinho, S. P. M. Ventura and A. Pessoa, *Process Biochem.*, 2015, **50**, 661-668.
